# Supplementary material for: Silver nanoparticles: green synthesis, self-assembled nanostructures and their application as SERS substrates
Source: Royal Society of Chemistry journal article supplement (doi:10.1039/c4nj02239d), 2015-01-01

## Supplementary Information

**Figure SM1.** Citric extracts peels and silver nanoparticles colloids after 60 min of reaction.

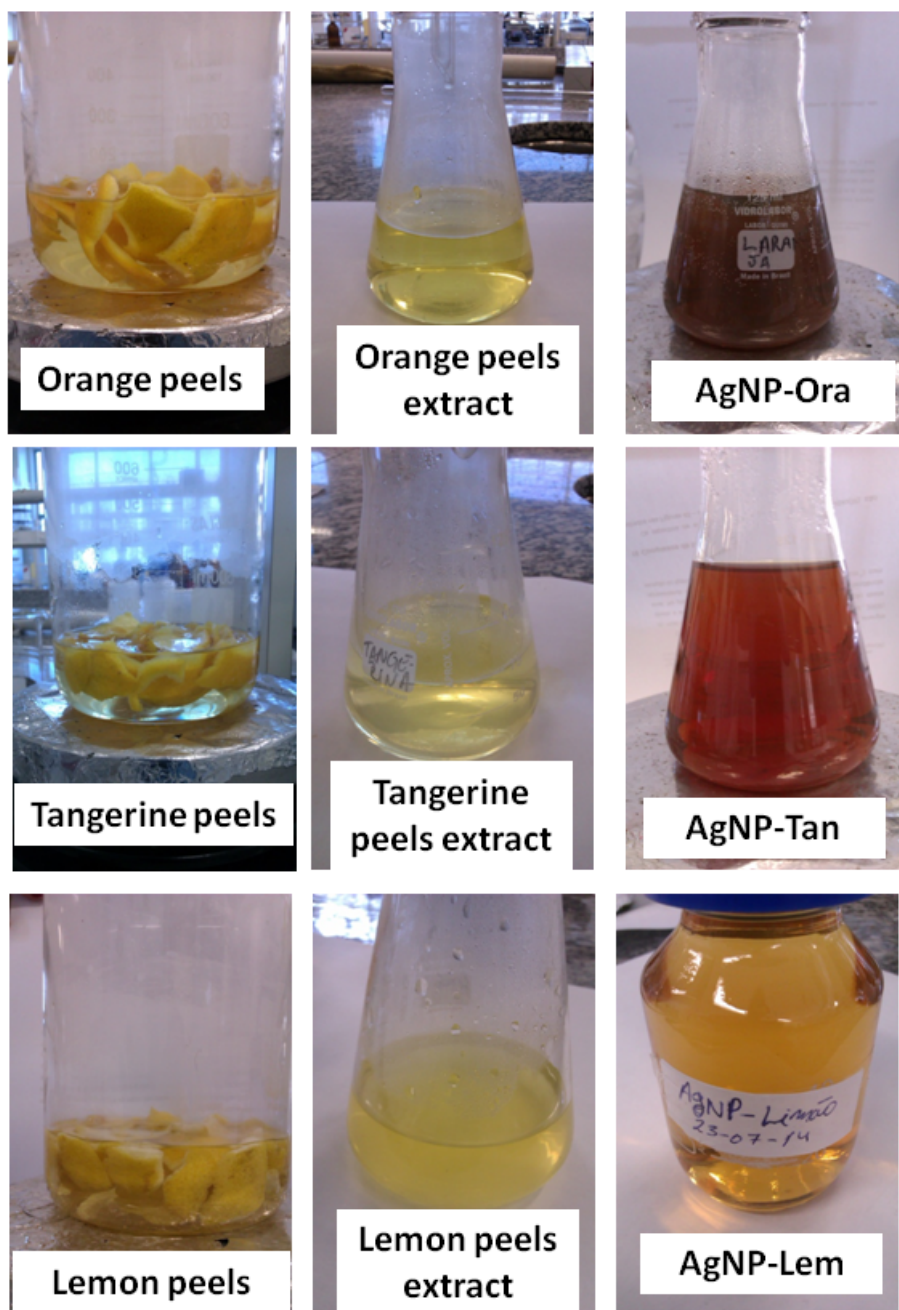

**Figure SM2.** HRTEM images of the AgNP-Ora, AgNP-Tan, and AgNP-Lem.

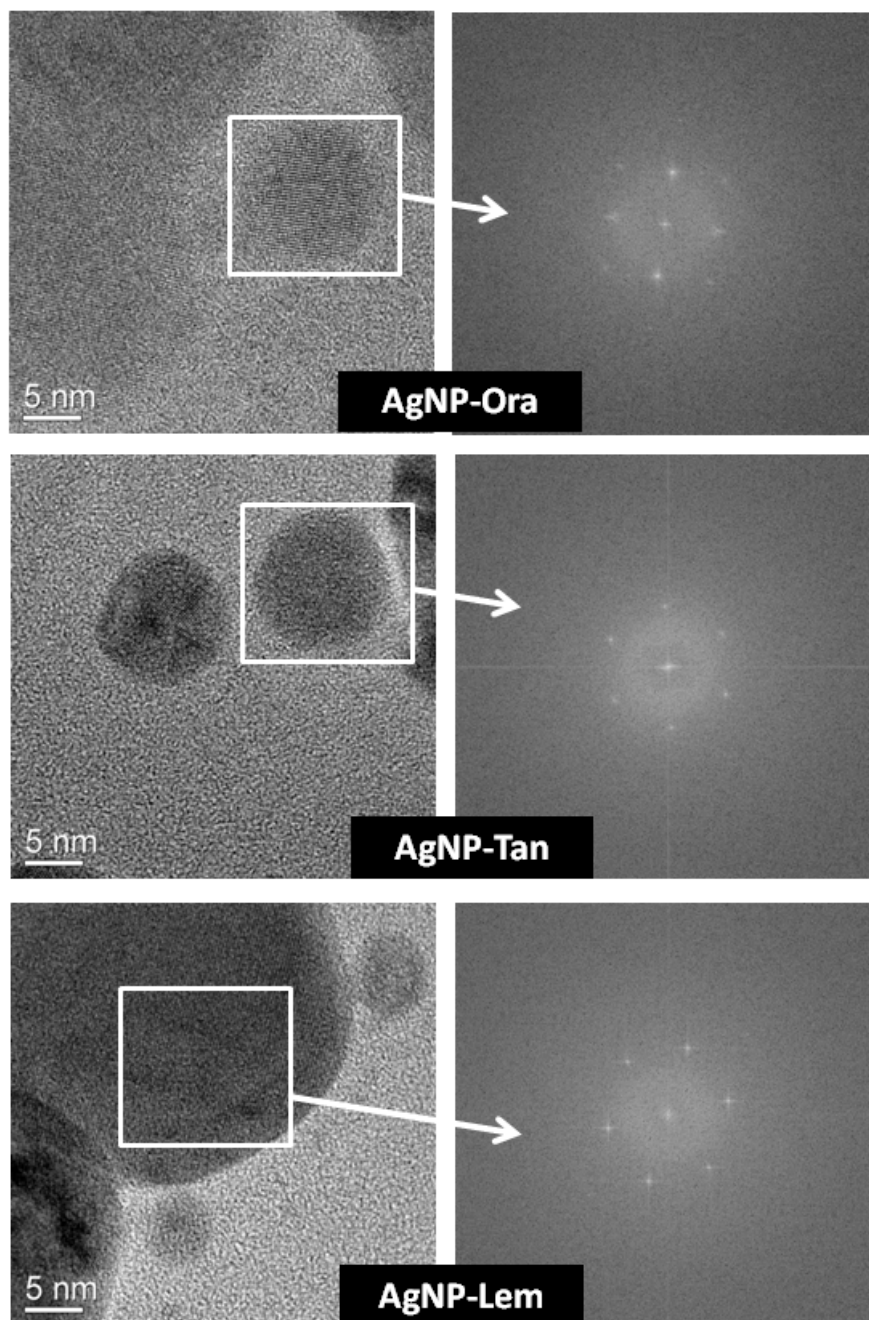

Supplement: c4nj02239d1.pdf [file c4nj02239d1.pdf]
